# Supplementary material
Source: PubMed Central journal article supplement (PMC3183163)
Supplement: NIHMS280670-supplement-01.pdf [file NIHMS280670-supplement-01.pdf]

|                      | <b>Control Diet<br/>5755</b> | <b>Low Protein<br/>5769</b> |
|----------------------|------------------------------|-----------------------------|
| <b>Ingredients</b>   |                              |                             |
| Dextrin              | 43.65                        | 43.2                        |
| Casein-Vitamin Free  | 21                           | 9.45                        |
| Sucrose              | 15                           | 27.1                        |
| RP Mineral Mix       | 5                            | 5                           |
| Corn Oil             | 5                            | 5                           |
| Lard                 | 5                            | 5                           |
| Powdered Cellulose   | 3                            | 3                           |
| RP Vitamin Mix       | 2                            | 2                           |
| Choline Chloride     | 0.2                          | 0.2                         |
| DL-Methionine        | 0.15                         | 0.05                        |
| <b>Protein</b>       |                              |                             |
| Arginine             | 18.6                         | 8.5                         |
| Histidine            | 0.73                         | 0.33                        |
| Isoleucine           | 0.54                         | 0.24                        |
| Leucine              | 1                            | 0.45                        |
| Lysine               | 1.82                         | 0.82                        |
| Methionine           | 1.53                         | 0.69                        |
| Cystine              | 0.69                         | 0.29                        |
| Phenylalanine        | 0.08                         | 0.03                        |
| Tyrosine             | 1                            | 0.45                        |
| Threonine            | 1.06                         | 0.48                        |
| Tryptophan           | 0.81                         | 0.37                        |
| Valine               | 0.23                         | 0.1                         |
| Alanine              | 1.2                          | 0.54                        |
| Aspartic Acid        | 0.58                         |                             |
| Glutamic Acid        | 1.35                         |                             |
| Glycine              | 4.29                         |                             |
| Proline              | 0.41                         | 0.18                        |
| Serine               | 2.47                         |                             |
| Taurine              | 1.16                         |                             |
|                      | 0                            |                             |
| <b>Fat</b>           |                              |                             |
| Cholesterol (ppm)    | 10                           | 10                          |
|                      | 48                           | 0                           |
| <b>Fiber</b>         |                              |                             |
|                      | 4.3                          | 4.3                         |
| <b>Carbohydrates</b> |                              |                             |
|                      | 60.6                         | 72.2                        |
| <b>Energy</b>        |                              |                             |
|                      | 4.07 (kcal/g)                | 4.13 (kcal/g)               |

|                            | <b>Control Diet<br/>5755</b> | <b>Low Protein<br/>5769</b> |
|----------------------------|------------------------------|-----------------------------|
| <b>Minerals</b>            |                              |                             |
| Calcium                    | 0.61                         | 0.6                         |
| Phosphorus                 | 0.57                         | 0.48                        |
| Potassium                  | 0.4                          | 0.4                         |
| Magnesium                  | 0.07                         | 0.07                        |
| Sodium                     | 0.24                         | 0.21                        |
| Chloride                   | 0.3                          | 0.24                        |
| Fluorine, ppm              | 5                            | 5                           |
| Iron, ppm                  | 65                           | 60                          |
| Zinc, ppm                  | 27                           | 21                          |
| Manganese, ppm             | 65                           | 65                          |
| Copper, ppm                | 15                           | 15                          |
| Cobalt, ppm                | 3.2                          | 3.2                         |
| Iodine, ppm                | 0.57                         | 0.57                        |
| Chromium, ppm              | 3                            | 3                           |
| Molybdenum, ppm            | 0.82                         | 0.82                        |
| Selenium, ppm              | 0.3                          | 0.23                        |
| <b>Vitamins</b>            |                              |                             |
| Vitamin A, IU/g            | 22.1                         | 22.1                        |
| Vitamine D-3, IU/g         | 2.2                          | 2.2                         |
| Vitamin E, IU/kg           | 50.1                         | 50                          |
| Vitamine K, ppm            | 10.4                         | 10.4                        |
| Thiamin Hydrochloride, ppm | 20.7                         | 20.6                        |
| Riboflavin, ppm            | 20.7                         | 20                          |
| Niacin, ppm                | 90                           | 90                          |
| Pantothenic Acid, ppm      | 56                           | 55                          |
| Folic Acid, ppm            | 4.2                          | 4                           |
| Pyridoxine, ppm            | 16.5                         | 16.5                        |
| Biotin, ppm                | 0.4                          | 0.4                         |
| Vitamin B-12, mcg/kg       | 24                           | 20                          |
| Choline Chloride, ppm      | 1400                         | 1400                        |
| Ascorbic Acid, ppm         | 0                            | 0                           |

**\*Values are % unless otherwise noted**
